# Supplementary material for: Spatial Insights into Drought Severity: Multi-Index Assessment in Małopolska, Poland, via Satellite Observations
Source: MDPI journal article supplement (doi:10.3390/rs16050836), 2024-02-28

**Supplementary File S1 – Full Set of Comparison Maps for NMDI and CDI;**

NMDI:    Very Wet    Wet    Dry    Very Dry

CDI:    No Drought    Watch    Warning    Alert    Recovery    TSMR    TVR

TSMR – Temporary Soil Moisture Recovery; TVR – Temporary Vegetation Recovery

**NMDI Interpreted 2018-04-20**

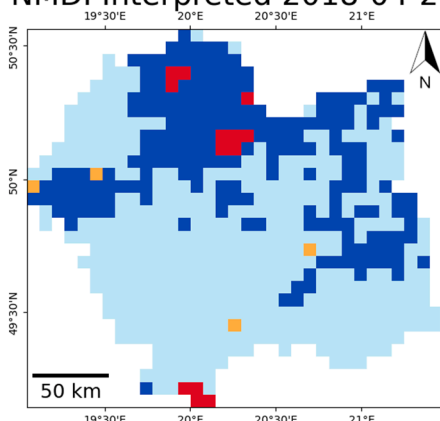

**CDI 2018-04-21**

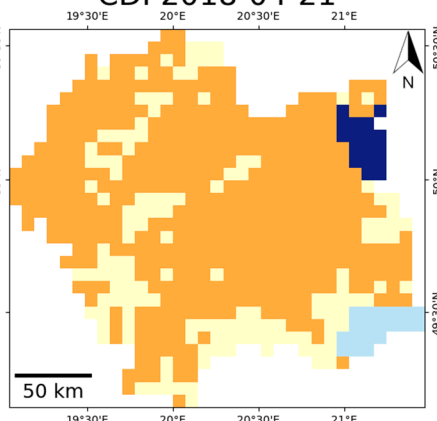

**NMDI Interpreted 2018-06-19**

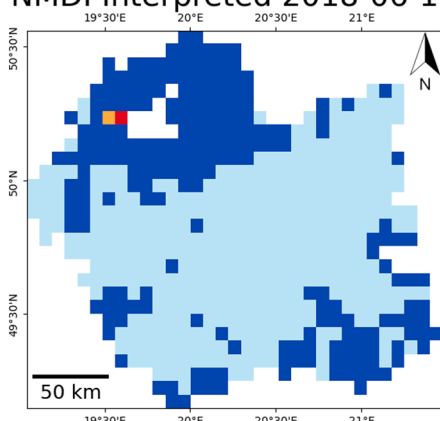

**CDI 2018-06-21**

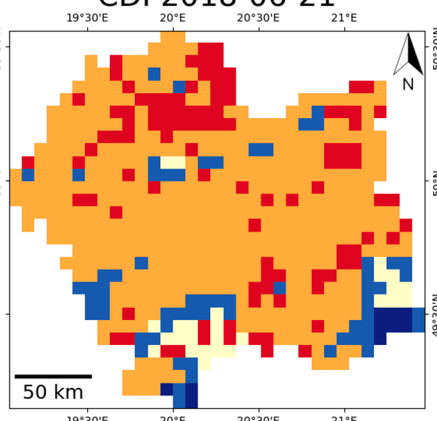

**NMDI Interpreted 2018-08-23**

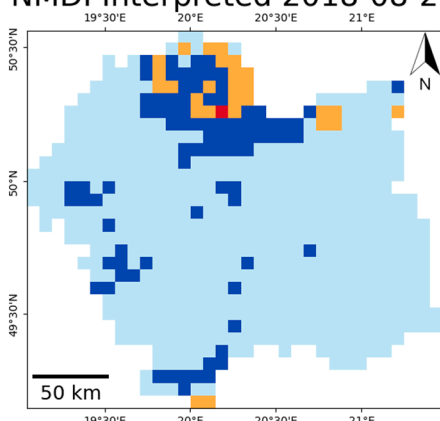

**CDI 2018-08-21**

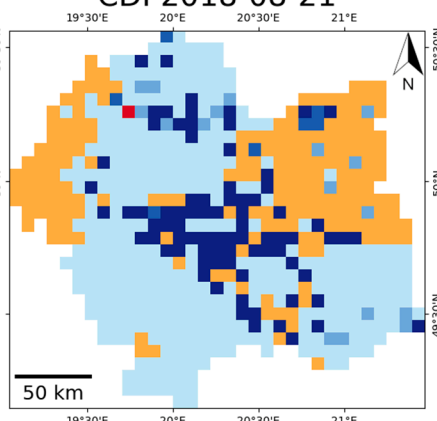

**NMDI Interpreted 2018-11-06**

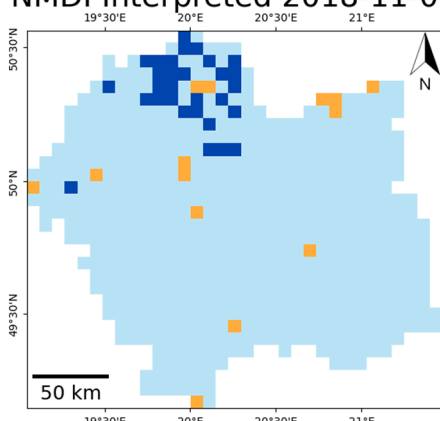

**CDI 2018-11-11**

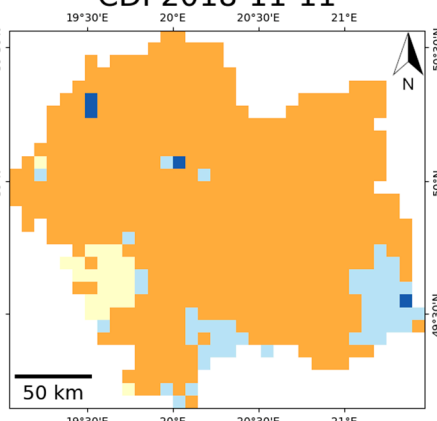

NMDI:    Very Wet    Wet    Dry    Very Dry  
 CDI:    No Drought    Watch    Warning    Alert    Recovery    TSMR    TVR  
 TSMR – Temporary Soil Moisture Recovery; TVR – Temporary Vegetation Recovery

NMDI Interpreted 2019-03-31

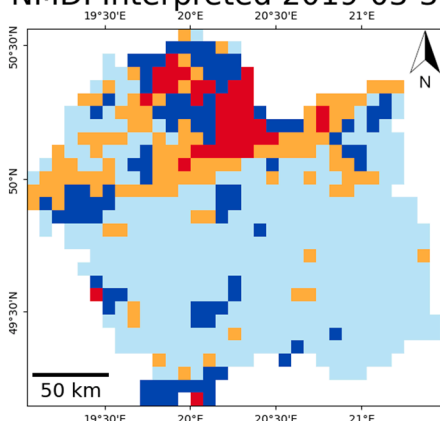

CDI 2019-04-01

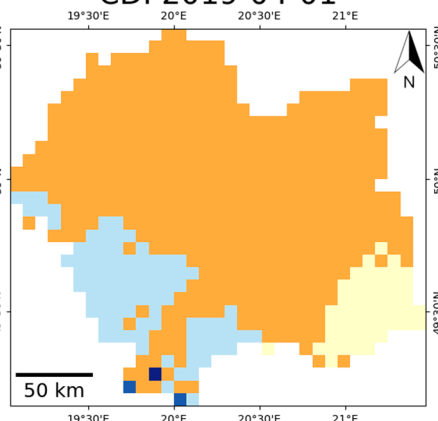

NMDI Interpreted 2019-06-09

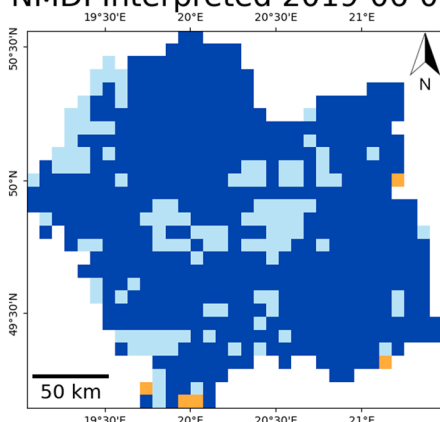

CDI 2019-06-11

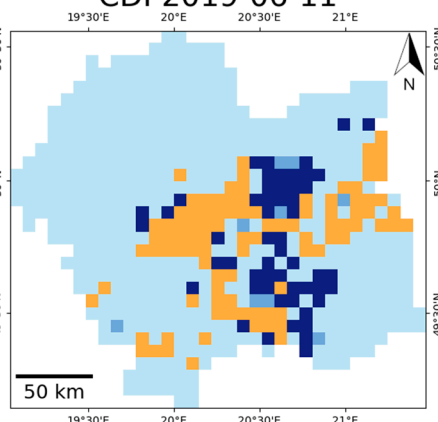

NMDI Interpreted 2019-08-28

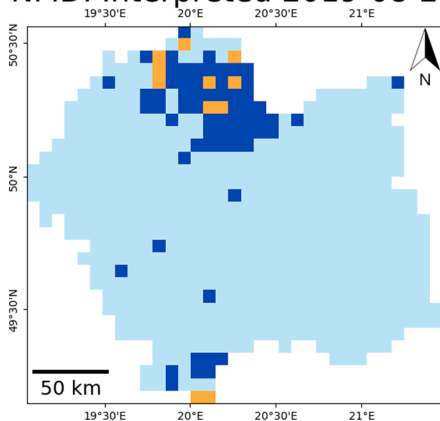

CDI 2019-09-01

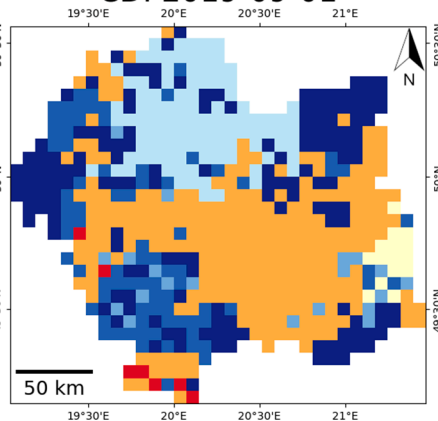

NMDI Interpreted 2019-10-27

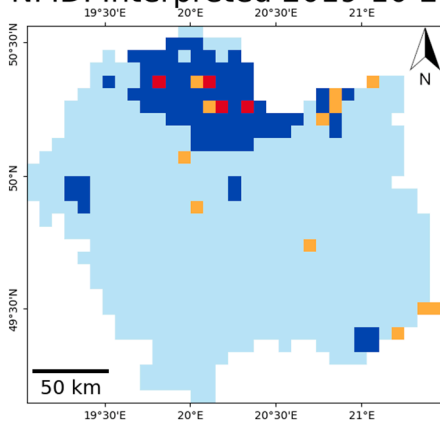

CDI 2019-11-01

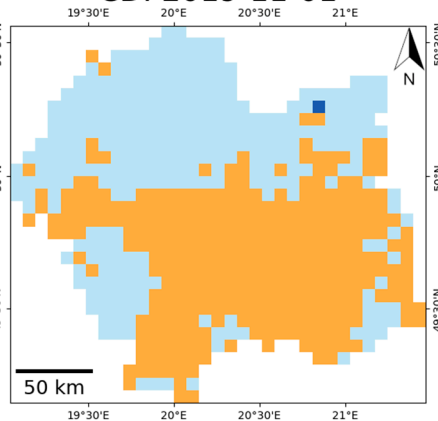

NMDI:    Very Wet    Wet    Dry    Very Dry  
 CDI:    No Drought    Watch    Warning    Alert    Recovery    TSMR    TVR  
 TSMR – Temporary Soil Moisture Recovery; TVR – Temporary Vegetation Recovery

NMDI Interpreted 2020-04-09

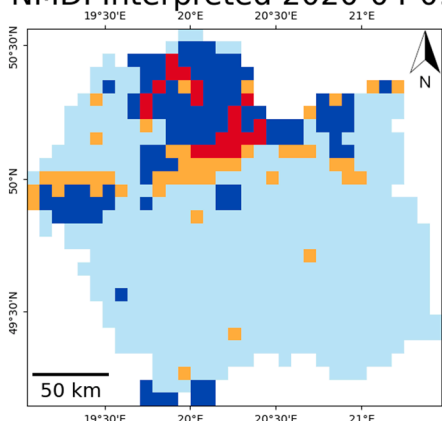

CDI 2020-04-11

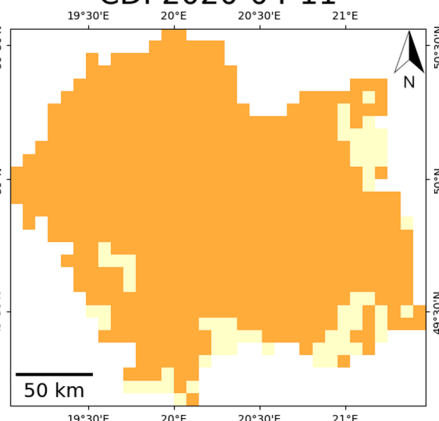

NMDI Interpreted 2020-06-13

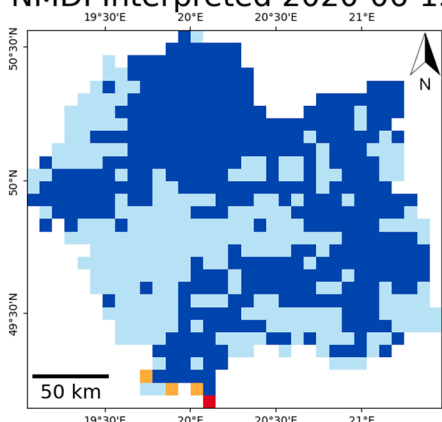

CDI 2020-06-11

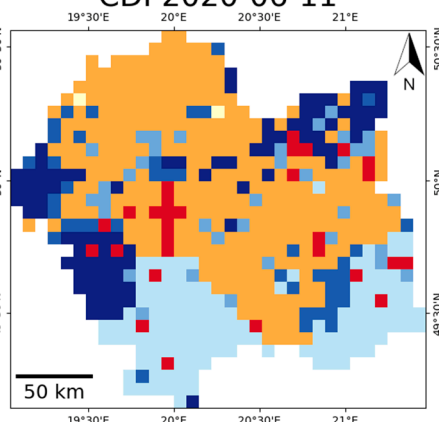

NMDI Interpreted 2020-08-22

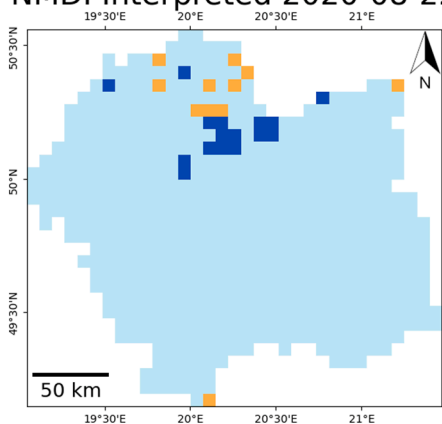

CDI 2020-08-21

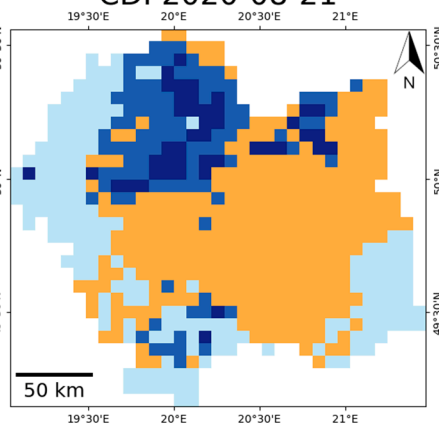

NMDI Interpreted 2020-11-25

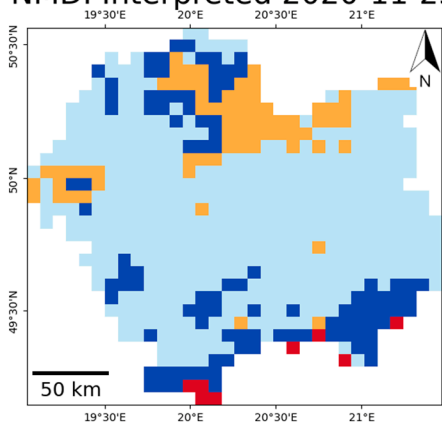

CDI 2020-11-21

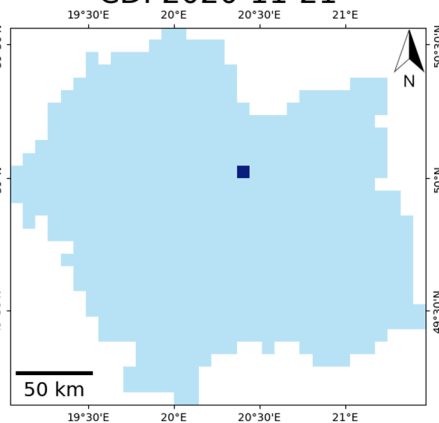

NMDI:    Very Wet    Wet    Dry    Very Dry  
 CDI:    No Drought    Watch    Warning    Alert    Recovery    TSMR    TVR  
 TSMR – Temporary Soil Moisture Recovery; TVR – Temporary Vegetation Recovery

NMDI Interpreted 2021-04-09

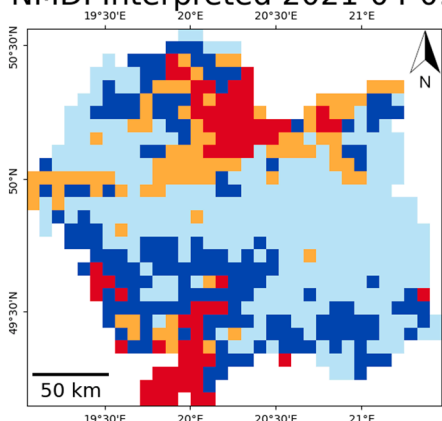

CDI 2021-04-11

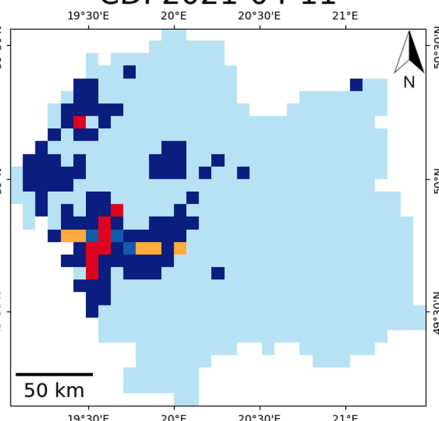

NMDI Interpreted 2021-06-18

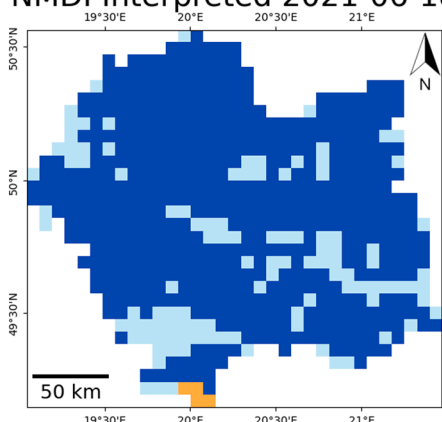

CDI 2021-06-21

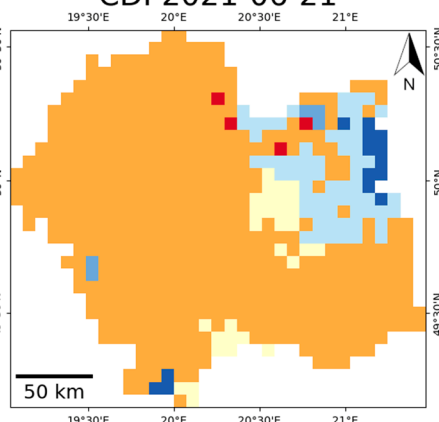

NMDI Interpreted 2021-09-06

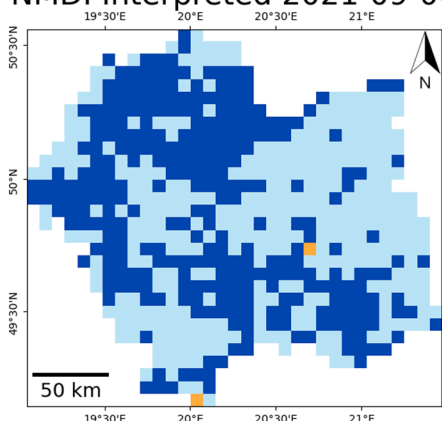

CDI 2021-09-11

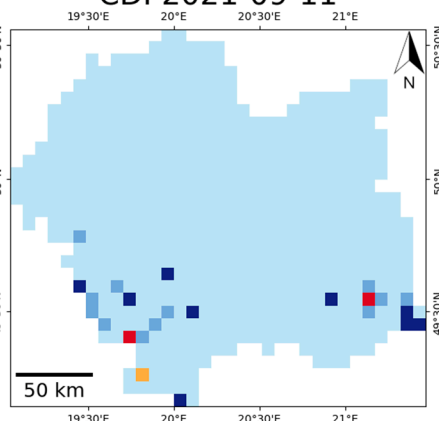

NMDI Interpreted 2021-10-31

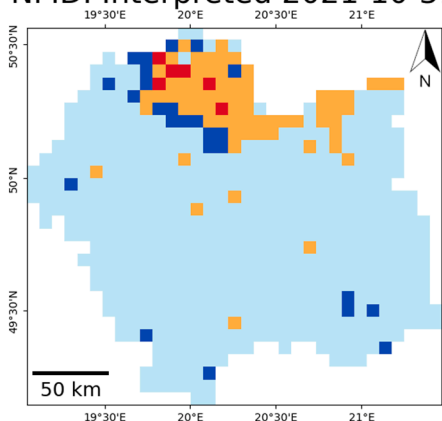

CDI 2021-11-01

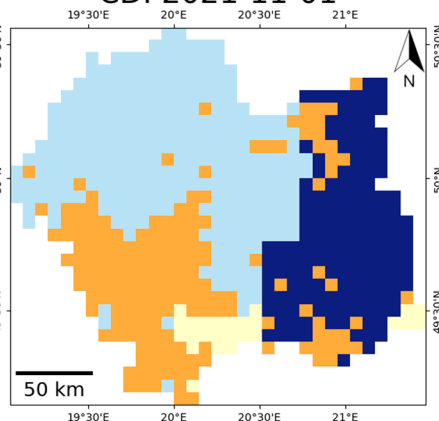

NMDI:    Very Wet    Wet    Dry    Very Dry  
 CDI:    No Drought    Watch    Warning    Alert    Recovery    TSMR    TVR  
 TSMR – Temporary Soil Moisture Recovery; TVR – Temporary Vegetation Recovery

NMDI Interpreted 2022-03-25

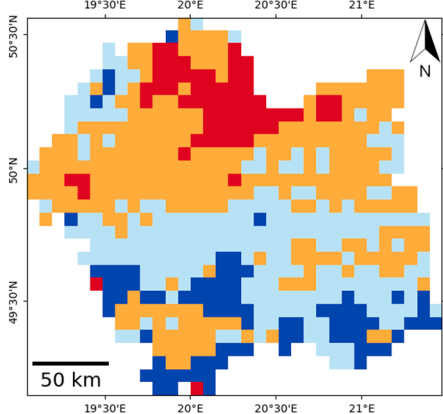

CDI 2022-03-21

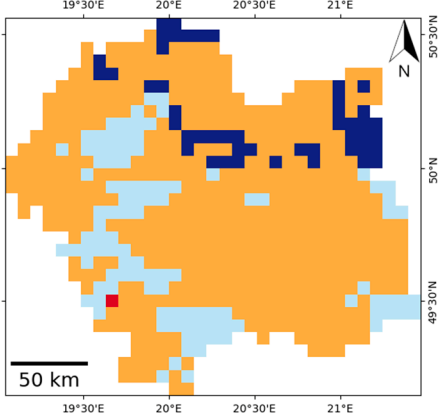

NMDI Interpreted 2022-06-03

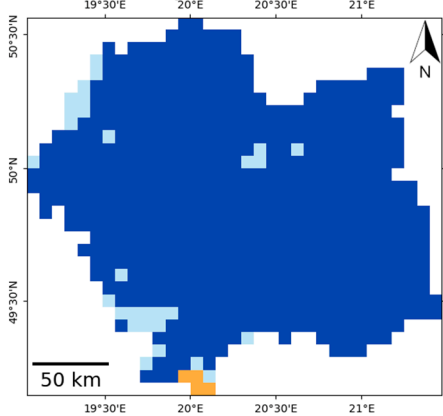

CDI 2022-06-01

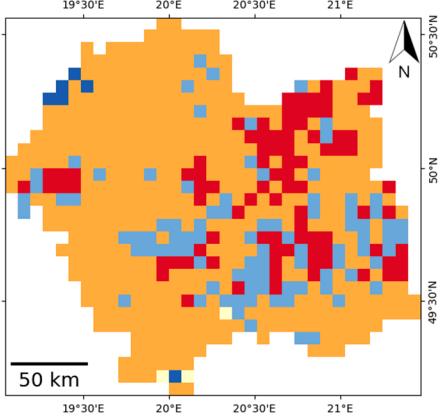

NMDI Interpreted 2022-08-27

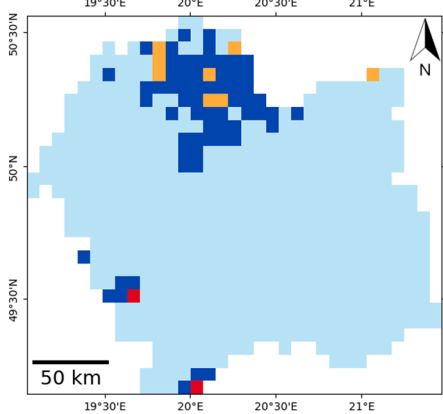

CDI 2022-09-01

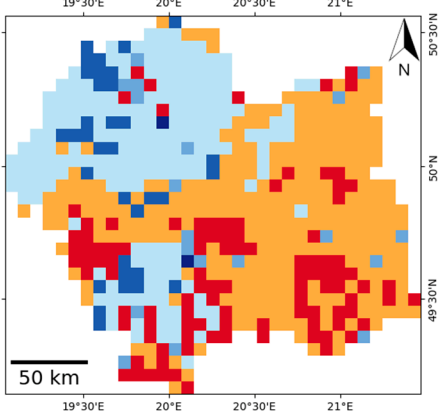

NMDI Interpreted 2022-10-31

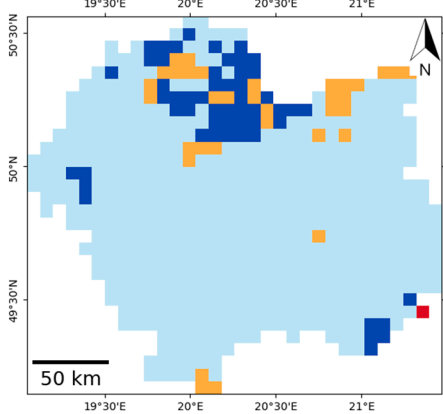

CDI 2022-11-01

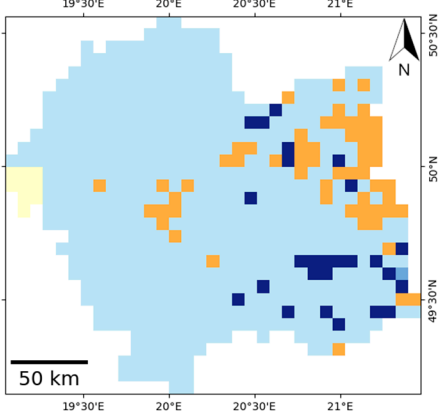

NMDI:    Very Wet    Wet    Dry    Very Dry  
 CDI:    No Drought    Watch    Warning    Alert    Recovery    TSMR    TVR  
 TSMR – Temporary Soil Moisture Recovery; TVR – Temporary Vegetation Recovery

NMDI Interpreted 2023-04-22

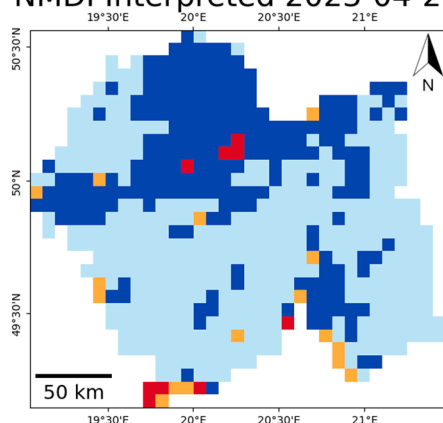

CDI 2023-04-21

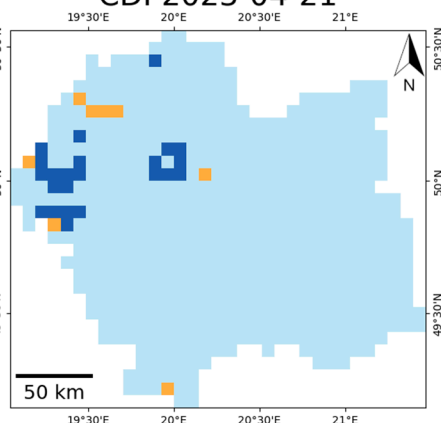

NMDI Interpreted 2023-06-03

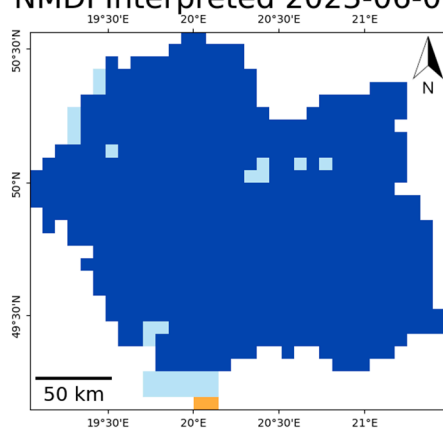

CDI 2023-06-01

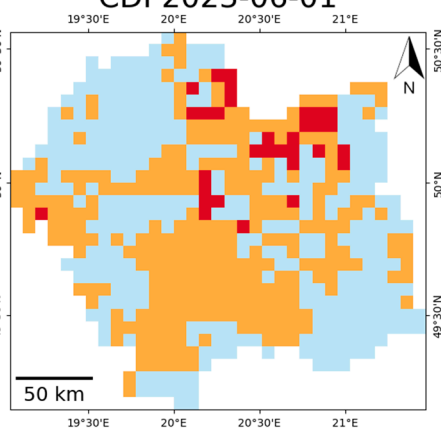

**Supplementary File S2** – Comparison of NMDI and CDI with rainfall anomaly computed based on cumulative rainfall from 30, 60 and 90 days.

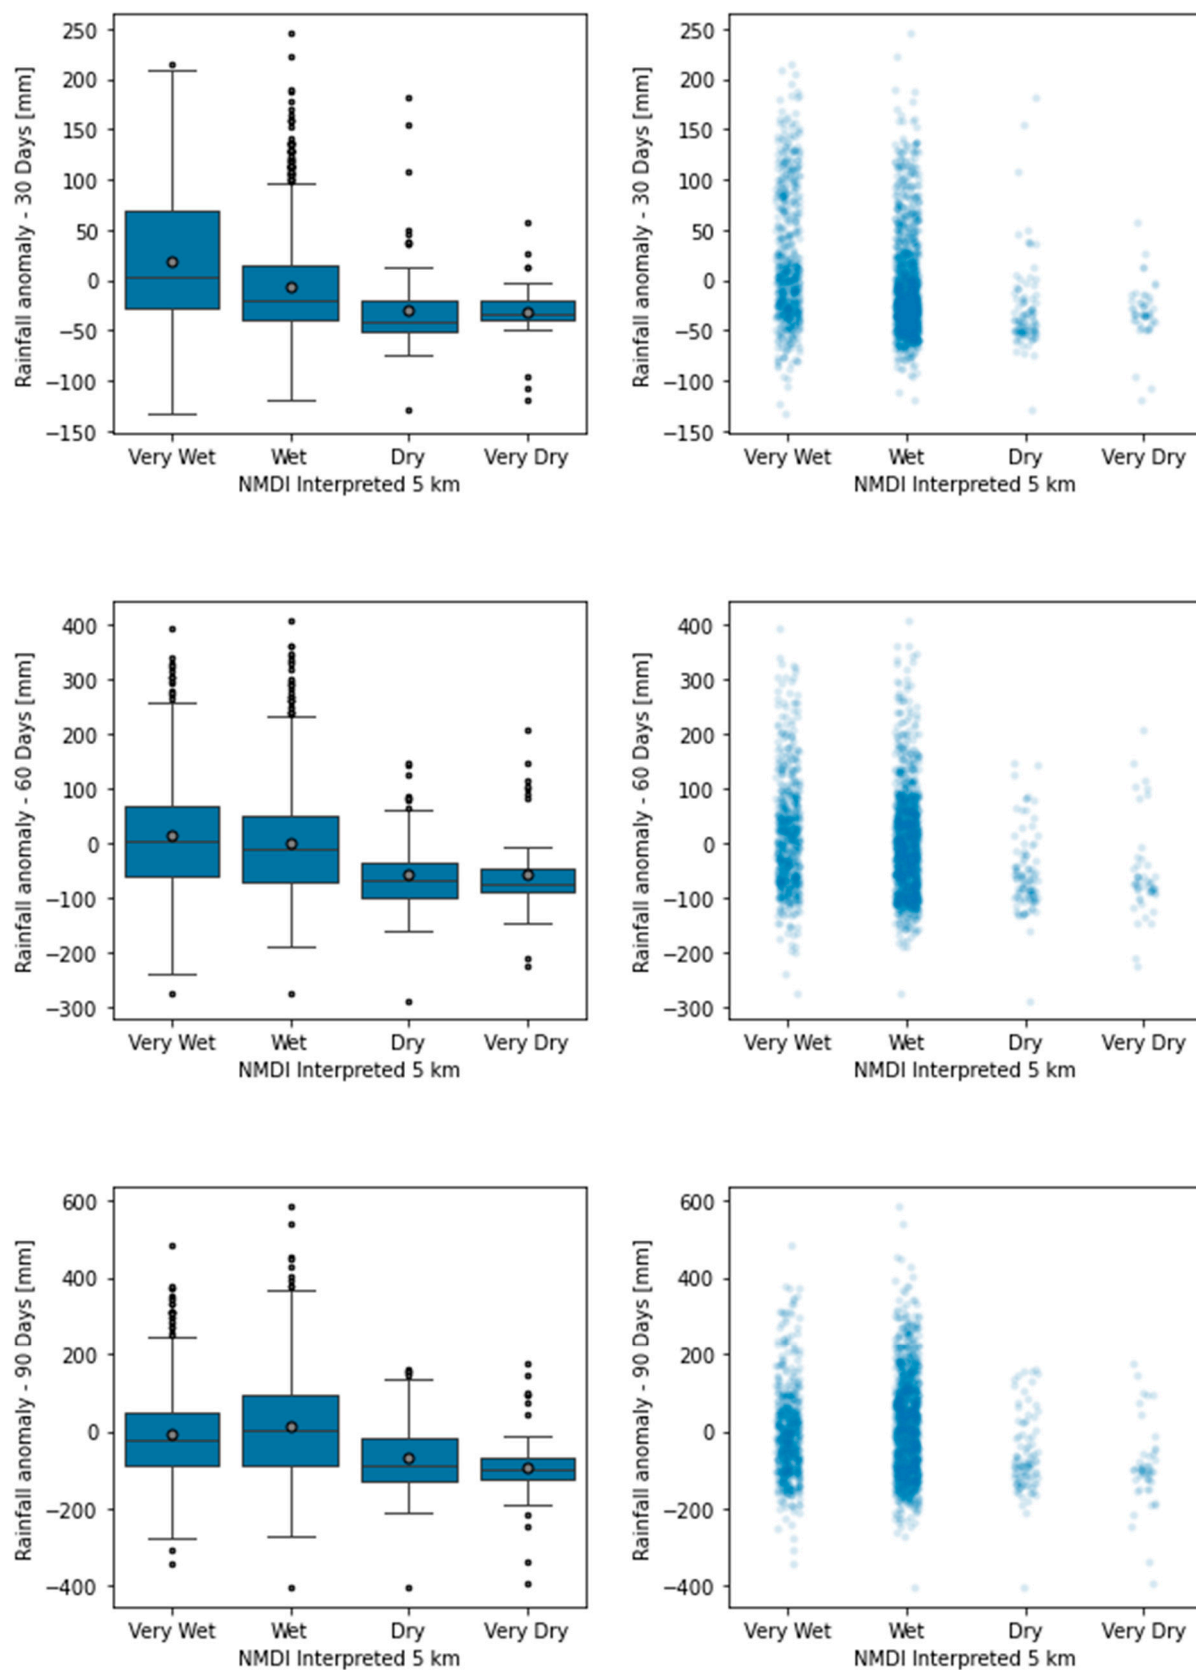

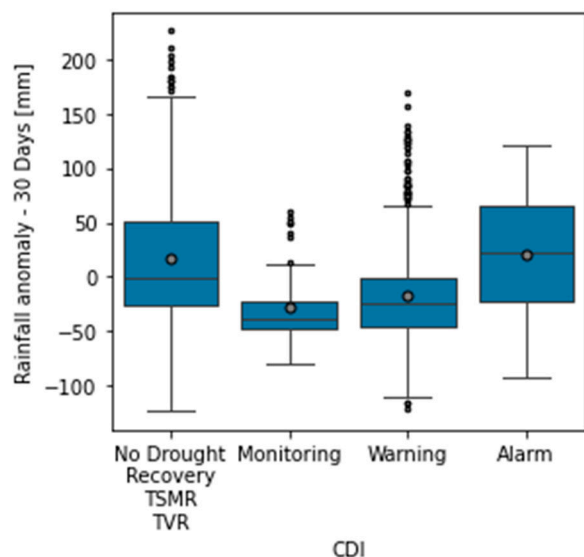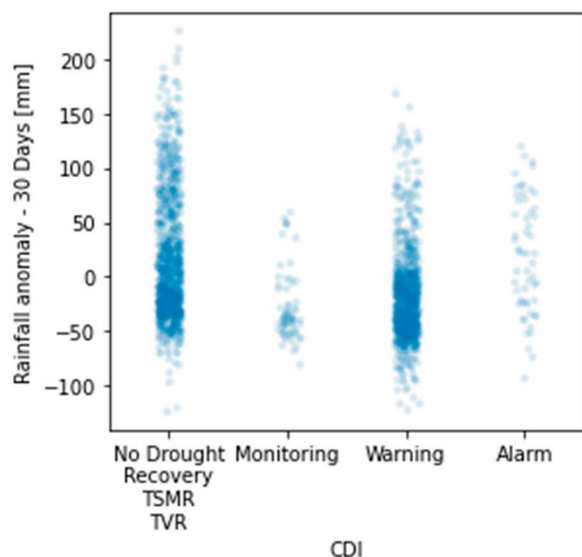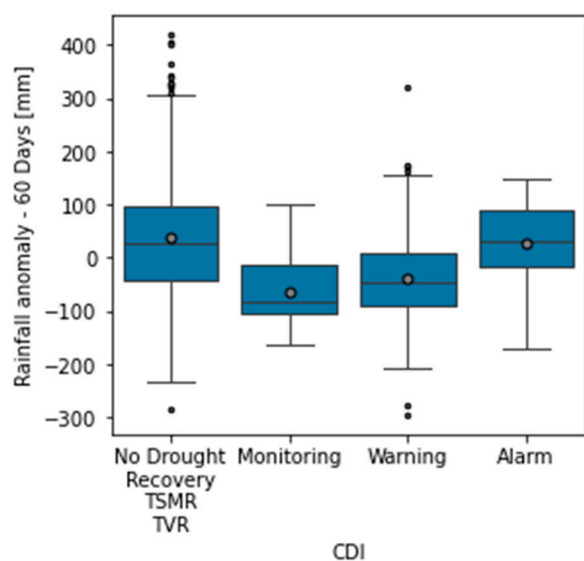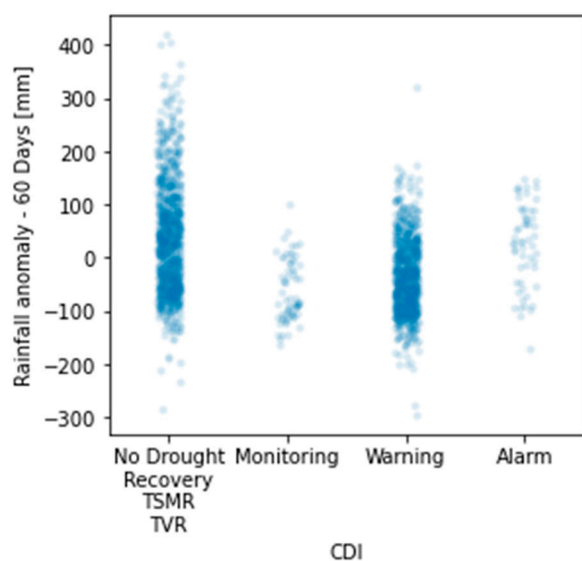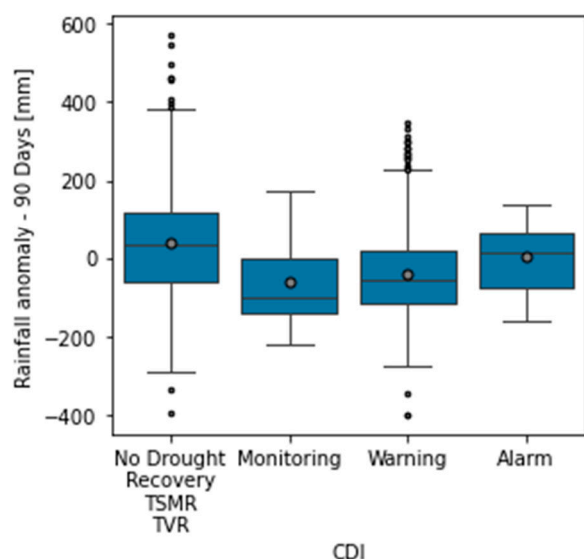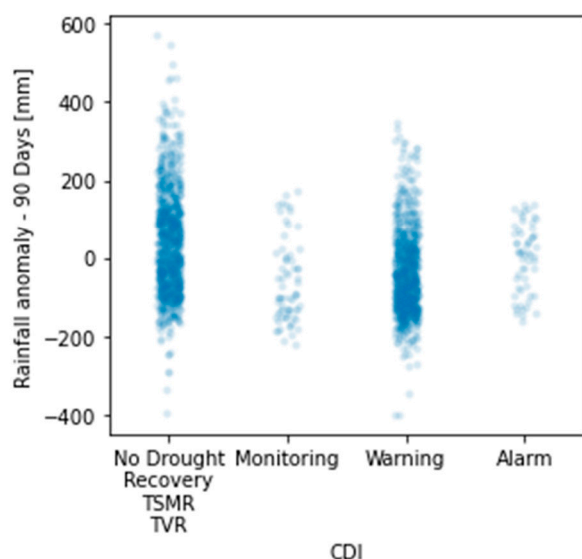



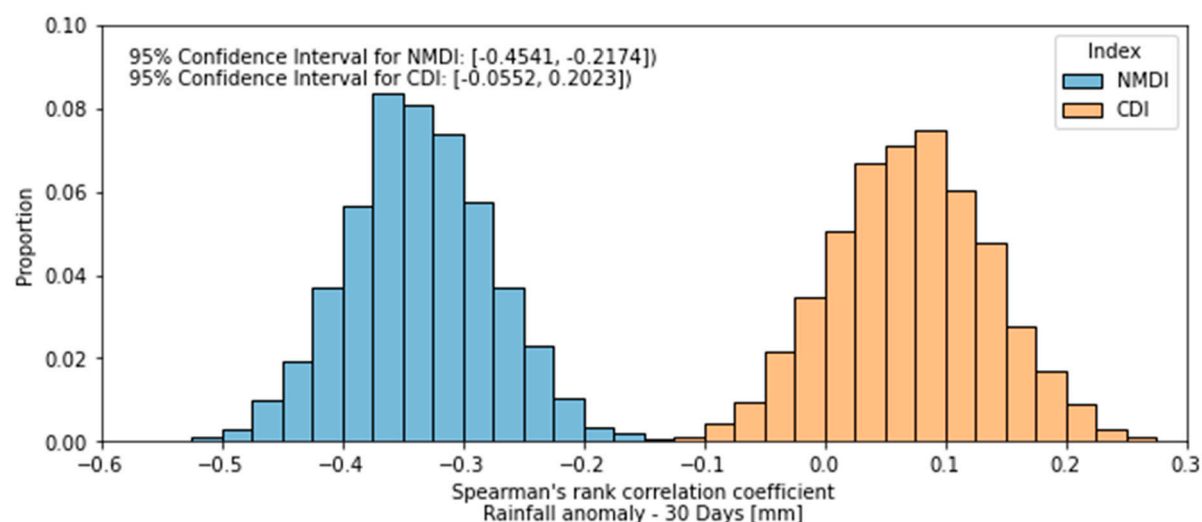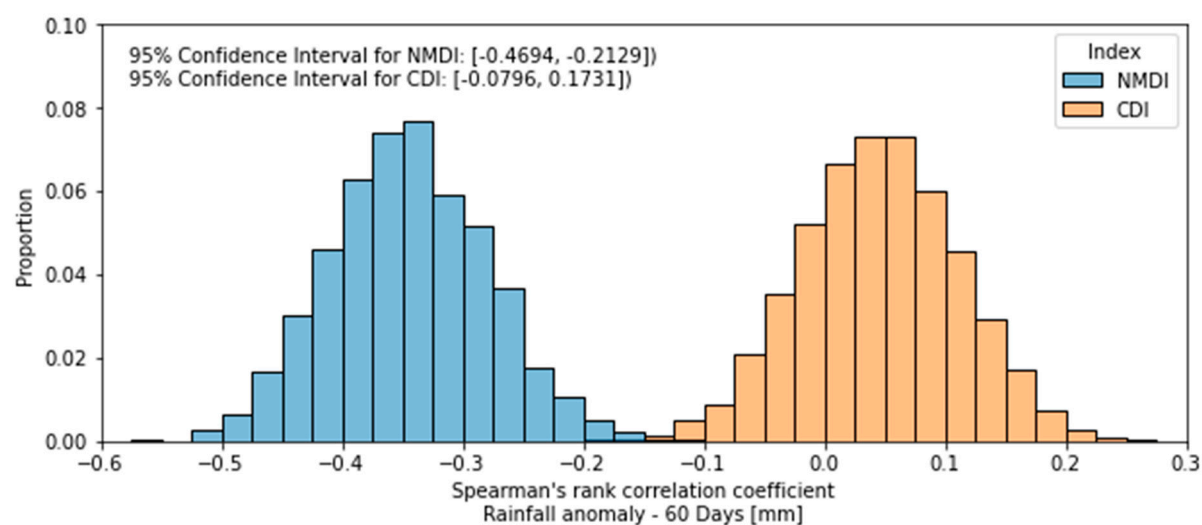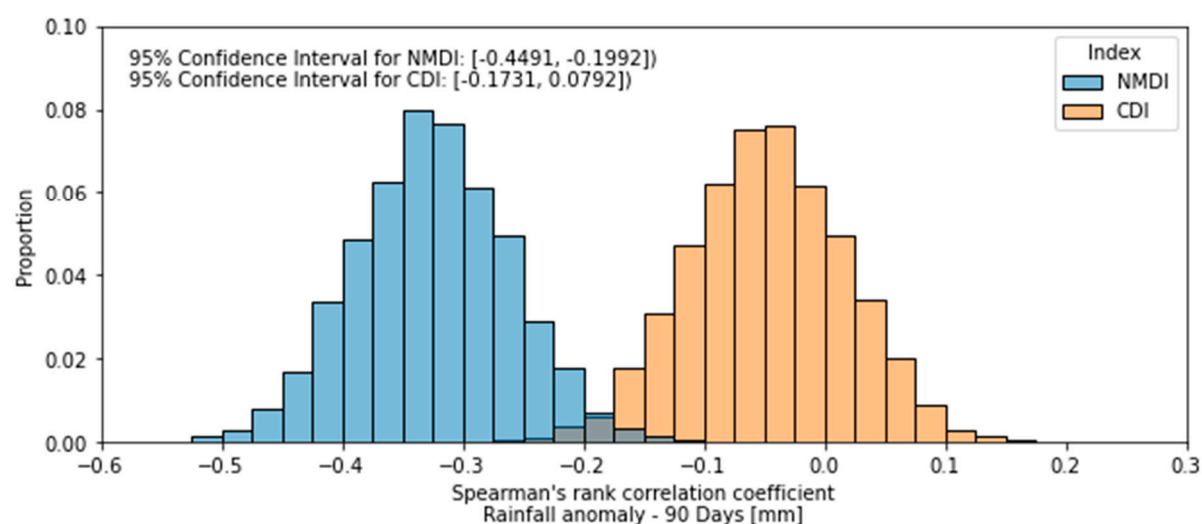

Supplement: s1 [file s1]
